# Supplementary material
Source: PubMed Central journal article supplement (PMC5086557)

**TABLE S1** Demographic and clinical characteristics of patients included in the study

| Sample code | Race/Sub-race           | Country/Region | Sex | Age (years) | Proton pump inhibitor (PPI) status | <i>Helicobacter pylori</i> status | Histopathological findings                            |
|-------------|-------------------------|----------------|-----|-------------|------------------------------------|-----------------------------------|-------------------------------------------------------|
| S01         | Caucasian/Mediterranean | Italy/Lazio    | M   | 46          | No treatment                       | Negative                          | Mild inflammation                                     |
| S02         | Caucasian/Mediterranean | Italy/Lazio    | F   | 65          | No treatment                       | Positive                          | Moderate inflammation                                 |
| S03         | Caucasian/Mediterranean | Italy/Lazio    | F   | 43          | No treatment                       | Negative                          | Mild inflammation                                     |
| S04         | Caucasian/Mediterranean | Italy/Lazio    | F   | 54          | No treatment                       | Positive                          | Severe inflammation, intestinal metaplasia            |
| S05         | Caucasian/Mediterranean | Italy/Lazio    | F   | 36          | No treatment                       | Positive                          | Moderate inflammation                                 |
| S06         | Caucasian/Mediterranean | Italy/Lazio    | M   | 41          | No treatment                       | Positive                          | Moderate inflammation                                 |
| S07         | Caucasian/Mediterranean | Italy/Lazio    | F   | 54          | No treatment                       | Negative                          | Mild inflammation                                     |
| S08         | Caucasian/Mediterranean | Italy/Lazio    | F   | 43          | No treatment                       | Positive                          | Moderate inflammation                                 |
| S09         | Caucasian/Mediterranean | Italy/Lazio    | M   | 40          | No treatment                       | Negative                          | Mild inflammation                                     |
| S10         | Caucasian/Mediterranean | Italy/Lazio    | F   | 44          | No treatment                       | Negative                          | Mild inflammation                                     |
| S11         | Caucasian/Mediterranean | Italy/Lazio    | M   | 27          | No treatment                       | Negative                          | Mild inflammation                                     |
| S12         | Caucasian/Mediterranean | Italy/Lazio    | F   | 43          | No treatment                       | Negative                          | Moderate inflammation                                 |
| PPI01       | Caucasian/Mediterranean | Italy/Lazio    | M   | 83          | With treatment                     | Negative                          | Moderate inflammation                                 |
| PPI02       | Caucasian/Mediterranean | Italy/Lazio    | F   | 47          | With treatment                     | Negative                          | Moderate inflammation                                 |
| PPI03       | Caucasian/Mediterranean | Italy/Lazio    | F   | 47          | With treatment                     | Positive                          | Moderate inflammation                                 |
| PPI04       | Caucasian/Mediterranean | Italy/Lazio    | F   | 54          | With treatment                     | Negative                          | Moderate inflammation                                 |
| PPI05       | Caucasian/Mediterranean | Italy/Lazio    | M   | 61          | With treatment                     | Negative                          | Mild inflammation                                     |
| PPI06       | Caucasian/Mediterranean | Italy/Lazio    | F   | 66          | With treatment                     | Negative                          | Mild inflammation                                     |
| PPI07       | Caucasian/Mediterranean | Italy/Lazio    | F   | 68          | With treatment                     | Positive                          | Moderate inflammation, intestinal metaplasia, atrophy |
| PPI08       | Caucasian/Mediterranean | Italy/Lazio    | F   | 44          | With treatment                     | Negative                          | Mild inflammation, gastric gland polyps               |
| PPI09       | Caucasian/Mediterranean | Italy/Lazio    | F   | 40          | With treatment                     | Negative                          | Moderate inflammation, intestinal metaplasia          |
| PPI10       | Caucasian/Mediterranean | Italy/Lazio    | M   | 35          | With treatment                     | Positive                          | Moderate inflammation                                 |
| PPI11       | Caucasian/Mediterranean | Italy/Lazio    | F   | 85          | With treatment                     | Negative                          | Mild inflammation, intestinal metaplasia, atrophy     |
| PPI12       | Caucasian/Mediterranean | Italy/Lazio    | F   | 42          | With treatment                     | Positive                          | Moderate inflammation                                 |

**TABLE S2** Operational taxonomic units (OTUs) and coverage for the sequences obtained from gastric mucosal biopsy samples of 24 patients

| Sample code | No. of OTUs           |                        | Coverage <sup>c</sup> |
|-------------|-----------------------|------------------------|-----------------------|
|             | Observed <sup>a</sup> | Estimated <sup>b</sup> |                       |
| PPI01       | 185                   | 186                    | 0.9997                |
| PPI02       | 78                    | 80                     | 0.9987                |
| PPI03       | 133                   | 140                    | 0.9973                |
| PPI04       | 164                   | 170                    | 0.9976                |
| PPI05       | 114                   | 122                    | 0.9981                |
| PPI06       | 125                   | 143                    | 0.9958                |
| PPI07       | 129                   | 152                    | 0.9989                |
| PPI08       | 140                   | 163                    | 0.9967                |
| PPI09       | 98                    | 113                    | 0.9969                |
| PPI10       | 100                   | 113                    | 0.9898                |
| PPI11       | 117                   | 124                    | 0.9982                |
| PPI12       | 51                    | 59                     | 0.9849                |
| S01         | 104                   | 123                    | 0.9938                |
| S02         | 82                    | 86                     | 0.9988                |
| S03         | 122                   | 134                    | 0.9931                |
| S04         | 79                    | 89                     | 0.9960                |
| S05         | 69                    | 78                     | 0.9968                |
| S06         | 154                   | 160                    | 0.9996                |
| S07         | 129                   | 140                    | 0.9914                |
| S08         | 41                    | 74                     | 0.9979                |
| S09         | 107                   | 134                    | 0.9882                |
| S10         | 151                   | 160                    | 0.9966                |
| S11         | 76                    | 83                     | 0.9898                |
| S12         | 172                   | 199                    | 0.9969                |

<sup>a</sup> Calculated with UCLUST at a default sequence similarity level of 97%.

<sup>b</sup> Calculated with the Chao1 estimator of species richness.

<sup>c</sup> Calculated with the formula  $[1 - (n/N)]$ , where  $n$  is the number of singleton OTUs and  $N$  is the number of sequences in that sample.

**TABLE S3** Percentages of bacterial phyla found in the gastric mucosal biopsies from two groups of patients with dyspepsia

|         | Actinobacteria | Bacteroidetes | Firmicutes | Fusobacteria | Proteobacteria | Other |
|---------|----------------|---------------|------------|--------------|----------------|-------|
| PPI01   | 0.71           | 28.65         | 37.06      | 4.48         | 28.02          | 1.07  |
| PPI02   | 1.11           | 37.81         | 30.58      | 18.30        | 12.00          | 0.20  |
| PPI03   | 0.35           | 18.65         | 33.45      | 6.40         | 39.05          | 2.10  |
| PPI04   | 5.14           | 24.36         | 38.58      | 4.51         | 23.24          | 4.17  |
| PPI05   | 2.53           | 31.20         | 52.19      | 4.02         | 8.79           | 1.27  |
| PPI06   | 1.49           | 21.95         | 64.92      | 2.81         | 6.71           | 2.12  |
| PPI07   | 0.24           | 2.68          | 48.11      | 0.14         | 48.57          | 0.25  |
| PPI08   | 0.33           | 34.31         | 15.03      | 12.17        | 37.35          | 0.82  |
| PPI09   | 1.62           | 54.69         | 24.70      | 3.45         | 13.82          | 1.73  |
| PPI10   | 5.33           | 23.88         | 48.39      | 8.65         | 12.21          | 1.54  |
| PPI11   | 1.51           | 44.74         | 35.68      | 3.93         | 12.93          | 1.21  |
| PPI12   | 0.80           | 41.40         | 39.68      | 2.29         | 14.68          | 1.15  |
| Average | 1.76           | 30.36         | 39.03      | 5.93         | 21.45          | 1.47  |
| S01     | 0.44           | 56.85         | 24.88      | 5.80         | 8.83           | 3.19  |
| S02     | 0.86           | 15.82         | 33.82      | 39.56        | 7.59           | 2.35  |
| S03     | 3.79           | 60.05         | 25.30      | 6.52         | 3.56           | 0.79  |
| S04     | 0.36           | 14.79         | 16.00      | 0.95         | 67.21          | 0.69  |
| S05     | 0.34           | 5.89          | 6.23       | 3.16         | 84.20          | 0.18  |
| S06     | 1.97           | 18.04         | 18.77      | 3.27         | 57.06          | 0.88  |
| S07     | 0.95           | 20.83         | 41.45      | 2.68         | 27.47          | 6.60  |
| S08     | 0.16           | 4.71          | 6.10       | 0.05         | 88.97          | 0.02  |
| S09     | 0.39           | 47.61         | 17.62      | 4.79         | 28.45          | 1.14  |
| S10     | 2.03           | 16.05         | 38.80      | 1.64         | 22.82          | 18.68 |
| S11     | 1.70           | 40.58         | 16.16      | 0.91         | 26.31          | 14.34 |
| S12     | 1.60           | 55.81         | 30.06      | 3.46         | 6.28           | 2.79  |
| Average | 1.22           | 29.75         | 22.93      | 6.07         | 35.73          | 4.30  |

**TABLE S4** Detection of *Helicobacter* sequences by 454-pyrosequencing analysis and their relative abundances in gastric mucosal samples from the 24 patients, who did receive or not receive proton pump inhibitors for treatment

| Sample code | PPI treatment | HP status by conventional testing <sup>a</sup> | Presence (+) or absence (-) of <i>Helicobacter</i> sequences | Abundance (%) of <i>Helicobacter</i> sequences |
|-------------|---------------|------------------------------------------------|--------------------------------------------------------------|------------------------------------------------|
| S01         | No            | Negative                                       | +                                                            | 0.03                                           |
| S02         | No            | Positive                                       | +                                                            | 1.10                                           |
| S03         | No            | Negative                                       | -                                                            | 0.00                                           |
| S04         | No            | Positive                                       | +                                                            | 66.5                                           |
| S05         | No            | Positive                                       | +                                                            | 78.8                                           |
| S06         | No            | Positive                                       | +                                                            | 53.1                                           |
| S07         | No            | Negative                                       | -                                                            | 0.00                                           |
| S08         | No            | Positive                                       | +                                                            | 88.0                                           |
| S09         | No            | Negative                                       | -                                                            | 0.00                                           |
| S10         | No            | Negative                                       | +                                                            | 0.08                                           |
| S11         | No            | Negative                                       | -                                                            | 0.00                                           |
| S12         | No            | Negative                                       | +                                                            | 0.02                                           |
| PPI01       | Yes           | Negative                                       | +                                                            | 4.55                                           |
| PPI02       | Yes           | Negative                                       | +                                                            | 0.13                                           |
| PPI03       | Yes           | Positive                                       | +                                                            | 25.2                                           |
| PPI04       | Yes           | Negative                                       | -                                                            | 0.00                                           |
| PPI05       | Yes           | Negative                                       | -                                                            | 0.00                                           |
| PPI06       | Yes           | Negative                                       | -                                                            | 0.00                                           |
| PPI07       | Yes           | Positive                                       | +                                                            | 47.4                                           |
| PPI08       | Yes           | Negative                                       | -                                                            | 0.00                                           |
| PPI09       | Yes           | Negative                                       | -                                                            | 0.00                                           |
| PPI10       | Yes           | Positive                                       | +                                                            | 0.05                                           |
| PPI11       | Yes           | Negative                                       | -                                                            | 0.00                                           |
| PPI12       | Yes           | Positive                                       | +                                                            | 0.23                                           |

Abbreviations: PPI, proton pump inhibitor; HP, *Helicobacter pylori*.

<sup>a</sup>Patients were categorized as HP-positive or HP-negative according to both conventional (non-sequencing) methods such as histology and rapid urease test.

**TABLE S5** Adonis comparison of gastric bacterial community composition for patient groups included in the study

| Comparisons              |                          | Adonis Statistics |              |
|--------------------------|--------------------------|-------------------|--------------|
| Group A                  | Group B                  | R <sup>2</sup>    | P value      |
| HP+ / PPI-treated        | HP+ / untreated          | 0.2959            | 0.088        |
| HP+ / PPI-treated        | HP- / PPI-treated        | 0.1835            | 0.082        |
| <b>HP+ / PPI-treated</b> | <b>HP- / untreated</b>   | <b>0.3054</b>     | <b>0.018</b> |
| <b>HP+ / untreated</b>   | <b>HP- / PPI-treated</b> | <b>0.5693</b>     | <b>0.001</b> |
| HP- / PPI-treated        | HP- / untreated          | 0.1183            | 0.159        |
| <b>HP- / untreated</b>   | <b>HP+ / untreated</b>   | <b>0.5905</b>     | <b>0.001</b> |

Bold denotes statistically significant ( $P < 0.05$ ) differences among pairwise comparisons.

**FIG S1** Rarefaction curves of the 24 gastric biopsy samples studied. Biopsies were named as PPI01 to PPI12 or as S01 to S12, depending on whether the patients were ('PPI') or not ('S') treated with a proton pump inhibitor (PPI) drug at the time of sampling. Each curve plots the number of OTUs (observed species) as a function of the number of reads, and was calculated using 1000-fold resampling without replacement. All curves were cut off at 10,000 reads as indicated.

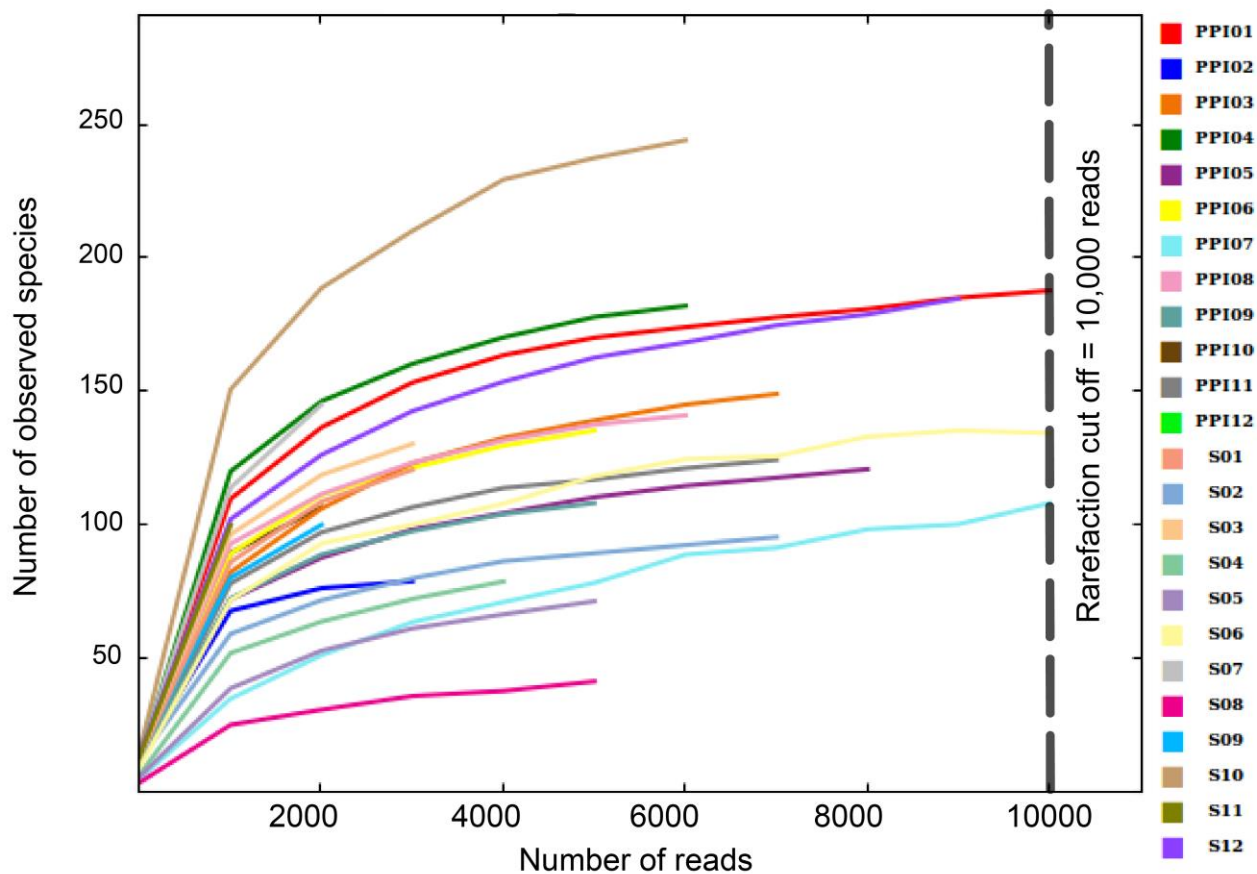

**FIG S2** Results of the analyses as shown in Fig. 4 that were obtained after *Helicobacter* sequences were left out of the analysis

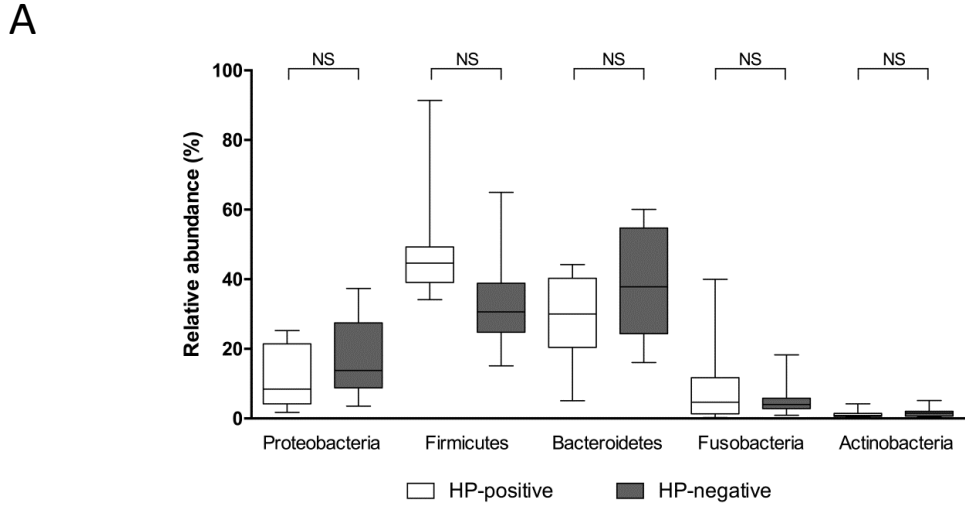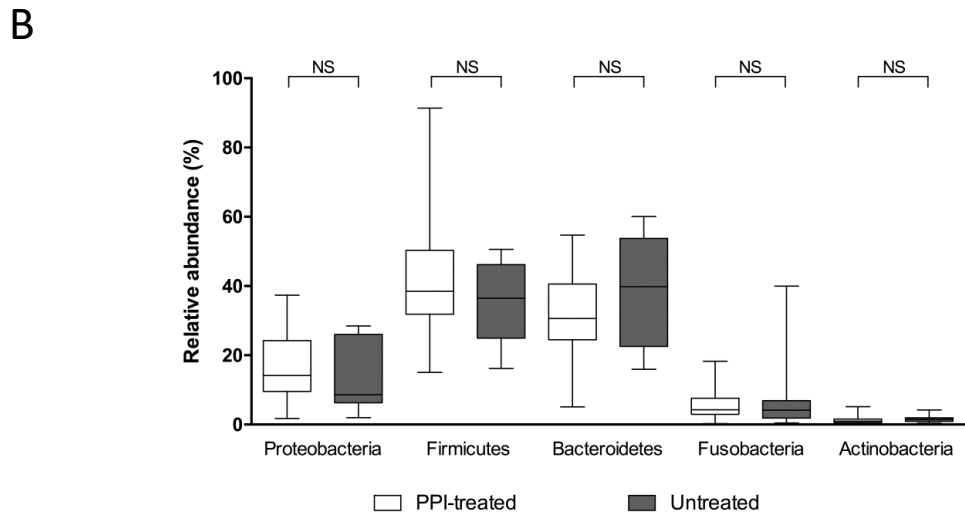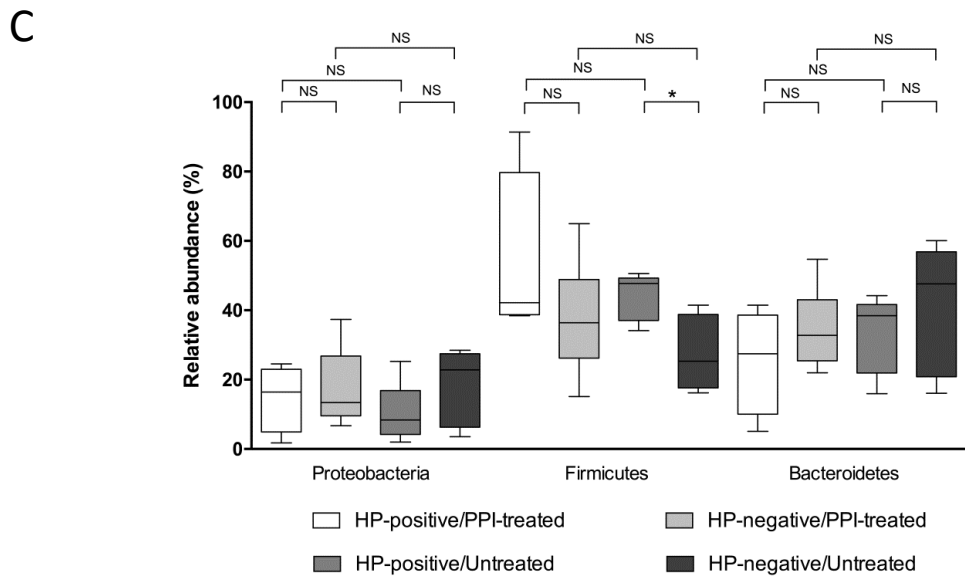

**FIG S3** Results of the analyses as shown in Fig. 5 that were obtained after *Helicobacter* sequences were left out of the analysis

**A**

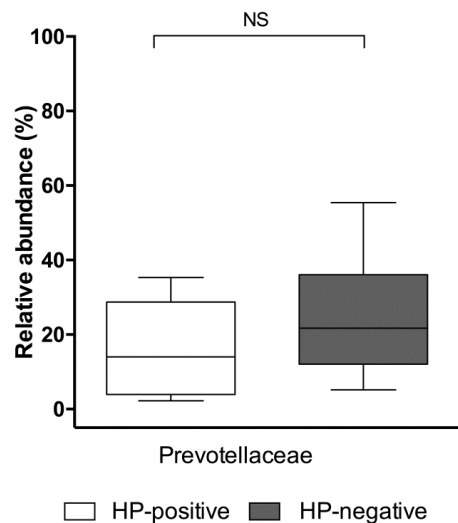

**B**

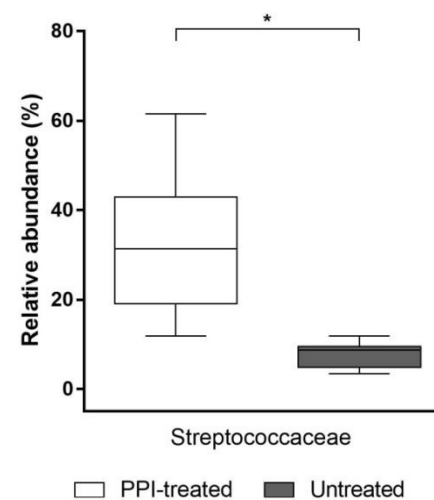

**C**

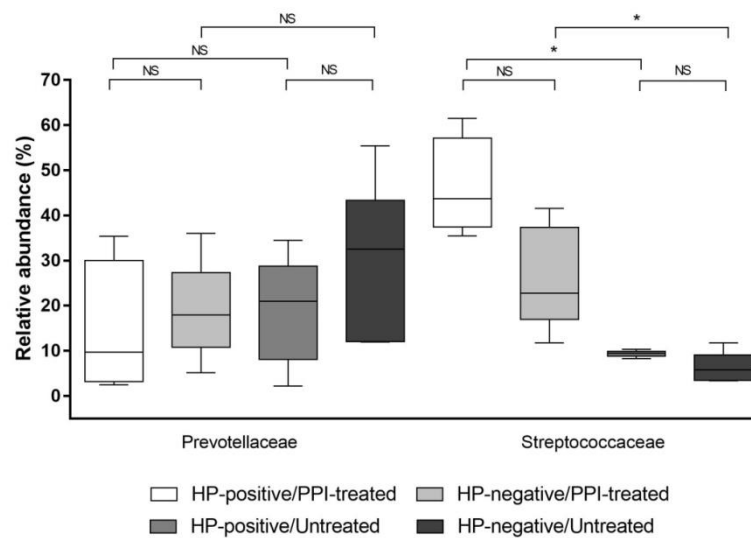

Supplement: AEM.01437-16_zam999117511so1.pdf [file AEM.01437-16_zam999117511so1.pdf]
